# Supplementary material for: Hybrid machine learning framework for battery remaining useful life prediction with time-series modelling and statistical validation
Source: PeerJ journal article supplement (doi:10.7717/peerj-cs.3478), 2026-01-23
Supplement: Computing_infrastructure.docx [file Computing_infrastructure.docx]

# Computing Environment

All experiments were conducted on a system with the following specifications:

Operating System- Windows 10 (64-bit)
Processor- intel Core i7 (10th Gen) @ 2.20GHz
RAM-16 GB
GPU-NVIDIA GeForce GTX 1650 (4 GB VRAM)

**Software Environment** - Python 3.9
 - TensorFlow 2.11 / Keras
 - Scikit-learn 1.2
 - XGBoost 1.7
 - NumPy, Pandas, Matplotlib, Seaborn
